# Supplementary material for: Novel pharmaceutical compositions through co-crystallization of racetams and Li+ salts
Source: Royal Society of Chemistry journal article supplement (doi:10.1039/c3ce41539b), 2013-01-01
Supplement: c3ce41539b.pdf [file c3ce41539b.pdf]

## Electronic Supplementary Information

### Novel Pharmaceutical Compositions through Co-crystallization of Racetams and Li<sup>+</sup> Salts

Johan Wouters,\* Fabrizia Grepioni,\* Dario Braga, Rafal M. Kaminski, Sandrine Rome, Luc Aerts and Luc Quéré

#### EXPERIMENTAL

All reagents and solvents were purchased from Acros Organics and used without further purification.

#### *Synthesis*

**BRV<sub>2</sub>·LiBr** was obtained by recrystallization of a deliquescent powder obtained by grinding (in a mortar) of BRV (350 mg) and LiBr (71 mg) (2:1 ratio); the deliquescent powder was left at ambient temperature/humidity and crystals suitable for X-ray single crystal diffraction were obtained.

**SEL<sub>2</sub>·LiBr** was obtained by recrystallization of a deliquescent powder obtained by grinding (in a mortar) of SEL (350 mg) and LiBr (65 mg) (2:1 ratio); the deliquescent powder was left at ambient temperature/humidity and crystals suitable for X-ray single crystal diffraction were obtained.

**SEL·LiCl·2H<sub>2</sub>O** was obtained by recrystallization of a deliquescent powder obtained by grinding (in a mortar) of SEL (350 mg) and LiCl (64 mg) (1:1 ratio); the deliquescent powder was left at ambient temperature/humidity and crystals suitable for X-ray single crystal diffraction were obtained.

#### *Crystals*

Powders obtained for each co-crystal are rather hygroscopic. Crystals (Figure S1) were grown from a deliquescent powder obtained by grinding.

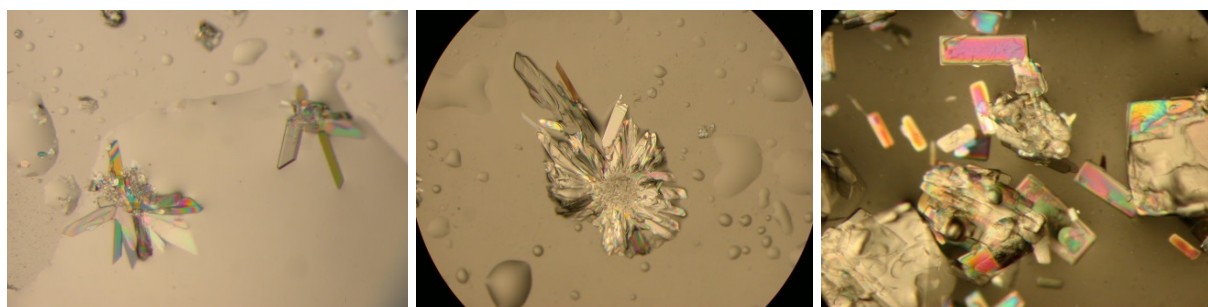

a) b) c)  
Figure S1. Single crystals grown for BRV<sub>2</sub>·LiBr (a), SEL<sub>2</sub>·LiBr (b) and SEL·LiCl·2H<sub>2</sub>O (c).

### ***Structural determination***

**Single crystal data.** All crystal data were collected at room temperature on an Enraf–Nonius CAD4 diffractometer with Cu-K $\alpha$  radiation,  $\lambda = 1.54181 \text{ \AA}$  and graphite monochromator. SHELX97<sup>ESI-1</sup> was used for structure solution and refinement based on F<sup>2</sup>. Non-hydrogen atoms were refined anisotropically. Hydrogen atoms were added in calculated positions. For structure **BRV<sub>2</sub>·LiBr** two conformations of the lateral propyl chain were refined. The program Schakal<sup>ESI-2</sup> was used for the graphical representation of the results. The program PLATON<sup>ESI-3</sup> was used to calculate hydrogen bond distances.

### ***References***

ESI-1 G. M. Sheldrick, *SHELXL97* **1997**, University of Göttingen, Germany.

ESI-2 E. Keller, **1999**, SCHAKAL99, Graphical Representation of Molecular Models; University of Freiburg, Germany.

ESI-3 A. L. Spek, *Journal of Applied Crystallography* **2003**, *36*, 7-13.
